# Supplementary material for: Modulating the photocatalytic redox preferences between anatase TiO2{001} and {101} surfaces
Source: Royal Society of Chemistry journal article supplement (doi:10.1039/c6cc08785j), 2016-12-15
Supplement: c6cc08785j1.pdf [file c6cc08785j1.pdf]

## Supporting Information

### Modulating the photocatalytic redox preferences between anatase TiO<sub>2</sub> {001} and {101} surfaces

Peng Zhou, Hongna Zhang, Hongwei Ji, Wanhong Ma, Chuncheng Chen\* and Jincui Zhao\*

Key Laboratory of Photochemistry, Beijing National Laboratory for Molecular Sciences, Institute of Chemistry The Chinese Academy of Sciences, Beijing 100190, P. R. China

#### Materials synthesis

Anatase TiO<sub>2</sub> crystals coexposed with {001} and {101} facets were prepared by a typical hydrothermal method with Ti(SO<sub>4</sub>)<sub>2</sub> as precursor and HF as morphology control agent. All of the reagents were of analytical grade and were used without further purification. Briefly, 0.21 g of Ti(SO<sub>4</sub>)<sub>2</sub> was dissolved in 50 mL of HF aqueous solution (0.184 mol L<sup>-1</sup>) under magnetic stirring. After 1 h of stirring, the mix solution was transferred to a Teflon-lined autoclave and the following hydrothermal reaction was carried out at 180 °C for 24 h. After the reaction, to inhibit the undesirable facet corrosion in natural cooling process, the Teflon-lined autoclave is rapidly cooled down to room temperature by water-cooling. Next, the white precipitate was separated by centrifugation and washed with deionized water for five times. To eliminate the surface F ions, the obtained product was calcinated at 450 °C for 2 h.<sup>1,2</sup>

#### Photo-deposition

*Photocatalytic oxidizing deposition of Fe<sub>2</sub>O<sub>3</sub> and MnO<sub>x</sub>.* For the deposition of Fe<sub>2</sub>O<sub>3</sub> by photooxidizing Fe<sup>2+</sup> ions, 20 mg of TiO<sub>2</sub> powder, 0.5 g of NaIO<sub>3</sub> as electron acceptor and 1 mL of 17.8 mol L<sup>-1</sup> FeSO<sub>4</sub> aqueous solution as the precursor of Fe<sub>2</sub>O<sub>3</sub> were mixed in 50 mL of deionized water under magnetic stirring for 30 min. The initial pH value of mixed solution containing FeSO<sub>4</sub> was 5.4. At ambient temperature, no reaction was observed under dark condition. However, when the mixed solution was irradiated by a 300 W Xe lamp equipped with infrared filter under continuous stirring, the color of the suspensions containing FeSO<sub>4</sub> were changed from aqua to yellow. After 3 h reaction, the yellow precipitate was separated by centrifugation and washed with deionized water for five times. Finally, the obtained product was dried at 60 °C for 6 h. The procedure for deposition of MnO<sub>x</sub> by photooxidizing Mn<sup>2+</sup> ions

was identical to that for  $\text{Fe}_2\text{O}_3$  deposition, except that the  $\text{FeSO}_4$  aqueous solution was replaced by 1 mL of  $18.2 \text{ mol L}^{-1}$   $\text{MnSO}_4$  aqueous solution as the precursor of  $\text{MnO}_x$  and the initial pH of the suspension in this case is 5.7. Brown powder was obtained after drying at  $60 \text{ }^\circ\text{C}$ .

For comparison,  $\text{Fe}^{2+}$  ions were directly thermally oxidized on  $\text{TiO}_2$ . For this purpose, the mixed solution containing  $\text{TiO}_2$  photocatalysts,  $\text{FeSO}_4$  and  $\text{NaIO}_3$  is heated to  $90 \text{ }^\circ\text{C}$ . The heating treatment can promote the direct reaction between  $\text{Fe}^{2+}$  ions and  $\text{NaIO}_3$  in the absence of  $\text{TiO}_2$  photoexcitation. After 3 h thermal reaction, the yellow precipitate was collected.

*Photocatalytic reducing deposition of  $\text{Fe}_2\text{O}_3$  and  $\text{MnO}_x$ .* For the deposition of  $\text{Fe}_2\text{O}_3$  by photoreducing  $\text{FeO}_4^{2-}$  ions, 20 mg of  $\text{TiO}_2$  powder and 1 mL of  $17.8 \text{ mol L}^{-1}$   $\text{K}_2\text{FeO}_4$  aqueous solution were mixed in 50 mL of deionized water under magnetic stirring for 30 min. The initial pH value of mixed solution containing  $\text{K}_2\text{FeO}_4$  was 10.2. For the photocatalytic reduction of  $\text{FeO}_4^{2-}$  ions, solvent  $\text{H}_2\text{O}$  acts as electron donor. Under Xe lamp irradiation, the color of the suspensions containing  $\text{K}_2\text{FeO}_4$  was changed from carnation to yellow. After 3 h reaction, the precipitate was collected. To investigate the photocatalytic redox preferences of deprotonated  $\text{TiO}_2$  {001} and {101} surfaces, 50 mL of deionized water in above experiments was replaced by 50 mL of  $0.05$  or  $0.5 \text{ mol L}^{-1}$   $\text{NaOH}$  aqueous solution. The pH values of corresponding mixed solutions were 12.5 and 13.5, respectively. The following procedures were the same with above photocatalytic experiments. For the deposition of  $\text{MnO}_x$  by photoreducing  $\text{MnO}_4^-$  ions, the  $\text{K}_2\text{FeO}_4$  aqueous solution were replaced by 1 mL of  $18.2 \text{ mol L}^{-1}$   $\text{KMnO}_4$  aqueous solution as the precursor of  $\text{MnO}_x$ , and the other precedures were identical to that for  $\text{Fe}_2\text{O}_3$  deposition. In this experiment, the initial pH of the suspension is 5.6 and the color of the suspensions was changed from purple to brown during the irradiation.

For comparison, the thermodeposition of  $\text{FeO}_4^{2-}$  ions was also carried out by heating the reacting suspension at  $90 \text{ }^\circ\text{C}$  for 3 h in deionized water or  $0.5 \text{ mol L}^{-1}$   $\text{NaOH}$  aqueous solution.

## Catalyst characterization

The crystalline phase of the prepared sample was characterized by the X-ray diffraction (XRD) patterns obtained on an X-ray diffractometer (Rigaku, Japan) using Cu K $\alpha$  radiation at a scan rate of 0.05° 2 $\theta$  s<sup>-1</sup>. The high-resolution transmission electron microscopy (HRTEM) analysis were conducted by a JEM-2100F electron microscope (JEOL, Japan) with a 200 kV accelerating voltage. The morphology of samples was obtained from an S-4800 field emission scanning electron microscopy (FESEM) (Hitachi, Japan) at an acceleration voltage of 20 kV. X-ray photoelectron spectroscopy (XPS) measurements were performed on an ESCALAB 250Xi electron spectrometer with Mg K $\alpha$  (1253.6 eV) source. All binding energies are referenced to the C 1s peaks at 284.8 eV from the adventitious carbon.

## Theoretical calculation

The surface chemical states of anatase TiO<sub>2</sub> {001} and {101} surfaces in aqueous solution were investigated by the density-functional-theory-based molecule dynamics (DFT-MD) method. All calculations were performed on the Vienna Ab-initio Simulation Package (VASP). 2 × 2 supercell with 9 O-Ti-O layers and 2 × 1 supercell with 8 O-Ti-O layers were used to simulate the TiO<sub>2</sub> {001} and {101} surfaces, respectively (Fig. S1). The interaction between adjacent atom slabs was eliminated by the vacuum slab with thickness of 20 Å. The vacuum slabs on TiO<sub>2</sub> {001} and {101} surfaces were filled with 34 and 48 of H<sub>2</sub>O molecules, respectively (Fig. 1a and 1c). The density of H<sub>2</sub>O molecules in the vacuum slabs is approximate to that of liquid water (1 g cm<sup>-3</sup>).

The Perdew-Burke-Ernzerhof (PBE) of the generalized gradient approximation (GGA) was used as the exchange-correlation function. The interaction between valence electrons and the ionic core was described by the PAW pseudo-potential. The plane-wave basis with energy cutoff of 450 eV was applied to the DFT-MD calculations. Considering the computational cost, the DFT-MD calculations were performed at the  $\Gamma$ -point only. The convergence threshold for total energy was set to 1.0 × 10<sup>-5</sup> eV. The built models were equilibrated at a temperature of 300 K, similar to the common experimental conditions. The time step was set to 1 fs and 5000 steps was required. After the equilibration, the obtained models were used to calculate the projected density of state (PDOS) plots. The cutoff energy of 450 eV and the Monkhorst-Pack k-point mesh of 4 × 4 × 1 were adopted for the PDOS calculations of TiO<sub>2</sub> {001} and {101} surfaces. To simulate the surface deprotonation process, the 4 water molecules (as the same number as the surface Ti<sub>5c</sub> sites) were replaced by OH<sup>-</sup> ions, and the corresponding number of Na<sup>+</sup> ions were also placed around the OH<sup>-</sup> ions to keep the electroneutrality of the slabs. By this way, the water molecules are formally replaced by NaOH (Fig. 1b and 1d). The deprotonation energy ( $E_{\text{deH}}$ ) of H<sub>2</sub>O molecules adsorbed on TiO<sub>2</sub> {001} and {101} surfaces is calculated by following Equation (1).<sup>3</sup>

$$E_{\text{deH}} = E(\text{Ti-H}_2\text{O}) + n \times E(\text{NaOH-H}_2\text{O}) - E(\text{Ti-NaOH}) - E(\text{H}_2\text{O}) \quad (1)$$

where  $E(\text{Ti-H}_2\text{O})$  is the total energy of H<sub>2</sub>O-adsorbed TiO<sub>2</sub> surface,  $E(\text{NaOH-H}_2\text{O})$  is

the total energy of NaOH-contained water group,  $E(\text{Ti-NaOH})$  is the total energy of NaOH-adsorbed  $\text{TiO}_2$  surface and  $E(\text{H}_2\text{O})$  is the total energy of water group. The water group contains 30  $\text{H}_2\text{O}$  molecules in the cubic box of  $10 \text{ \AA} \times 10 \text{ \AA} \times 10 \text{ \AA}$ , close to a density of liquid water ( $1 \text{ g cm}^{-3}$ ). For NaOH-contained water group, 29  $\text{H}_2\text{O}$  molecules, one  $\text{Na}^+$  ion and one  $\text{OH}^-$  ion are located in one cubic box of  $10 \text{ \AA} \times 10 \text{ \AA} \times 10 \text{ \AA}$ . The  $E(\text{H}_2\text{O})$  and  $E(\text{NaOH})$  were obtained from the DFT-MD simulations of pure and NaOH-contained water groups. The DFT-MD simulations of pure and NaOH-contained water groups share same parameter setting with those of  $\text{TiO}_2$  surfaces above. After the equilibration, the obtained energies of models were used as the  $E(\text{H}_2\text{O})$  of water group and the  $E(\text{NaOH})$  of NaOH-contained water group, respectively.

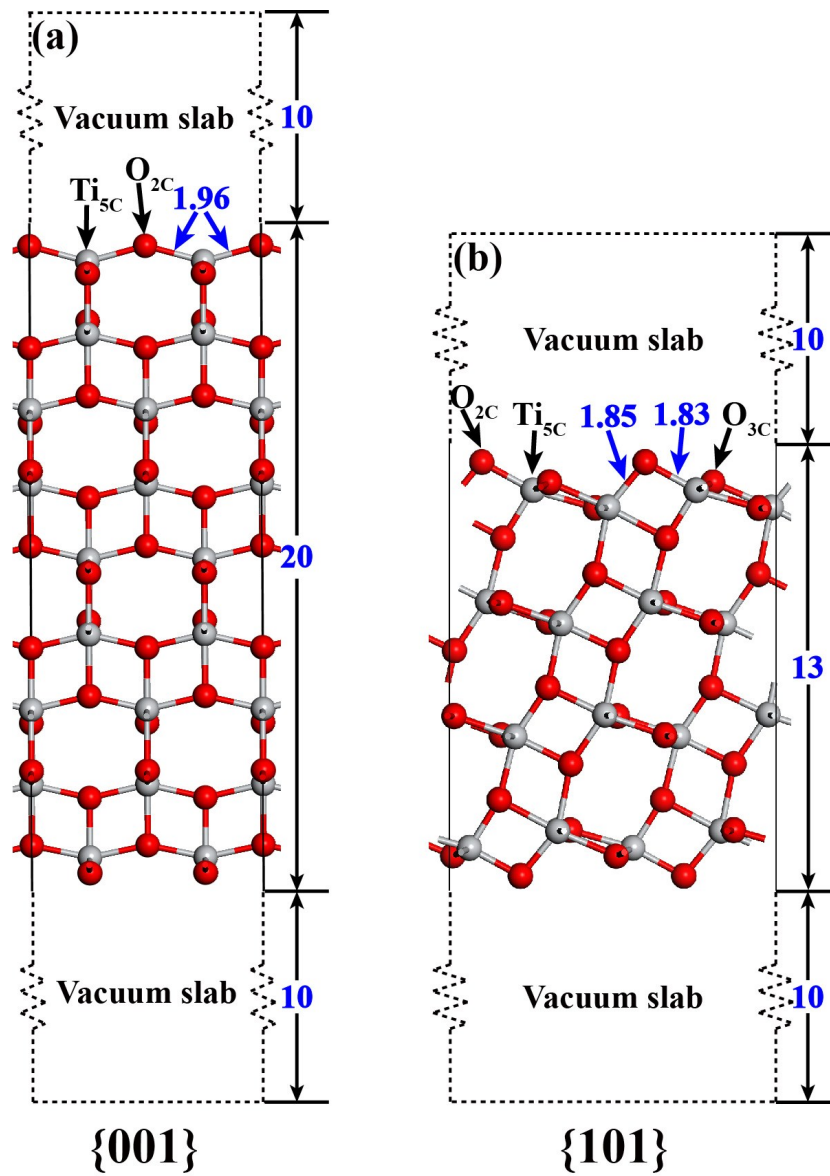

**Fig. S1.** Optimized geometry structures of  $\text{TiO}_2$  (a)  $\{001\}$  and (b)  $\{101\}$  surfaces.

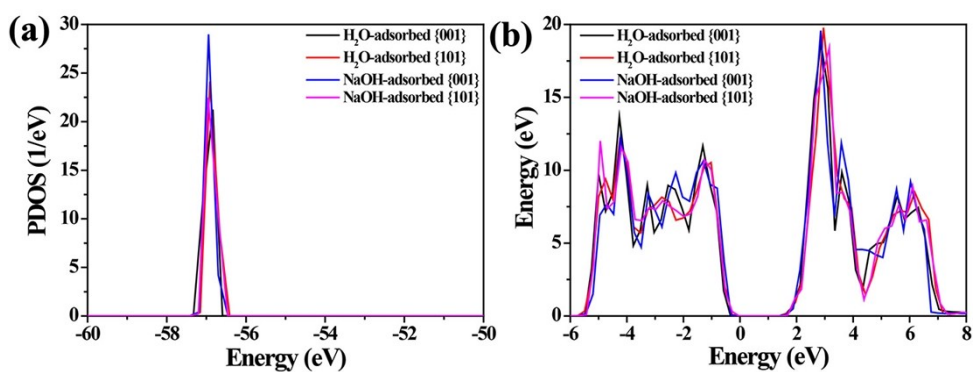

**Fig. S2.** The PDOS plots of middle O-Ti-O layer in H<sub>2</sub>O/NaOH-adsorbed TiO<sub>2</sub> {001} and {101} surfaces: (a) Ti 3d states and (b) VB/CB states.

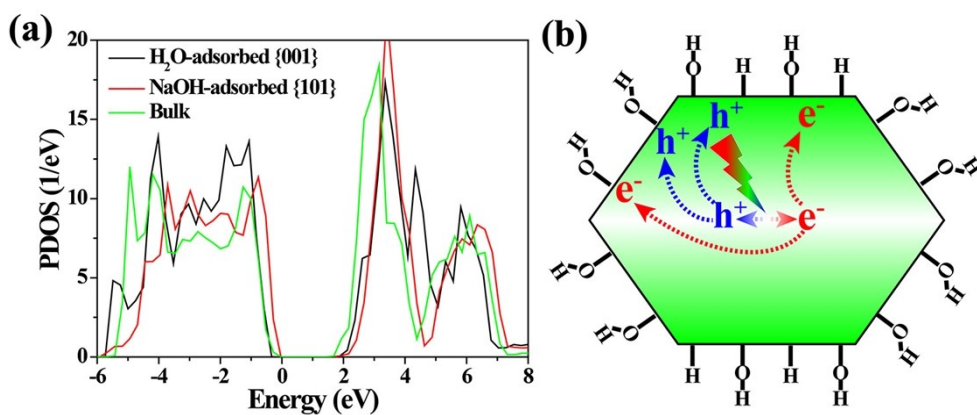

**Fig. S3.** (a) The PDOS plots of outmost O-Ti-O layer in H<sub>2</sub>O-adsorbed TiO<sub>2</sub> {001} and NaOH-adsorbed TiO<sub>2</sub> {101} surfaces and (b) the corresponding charge-transfer mechanism.

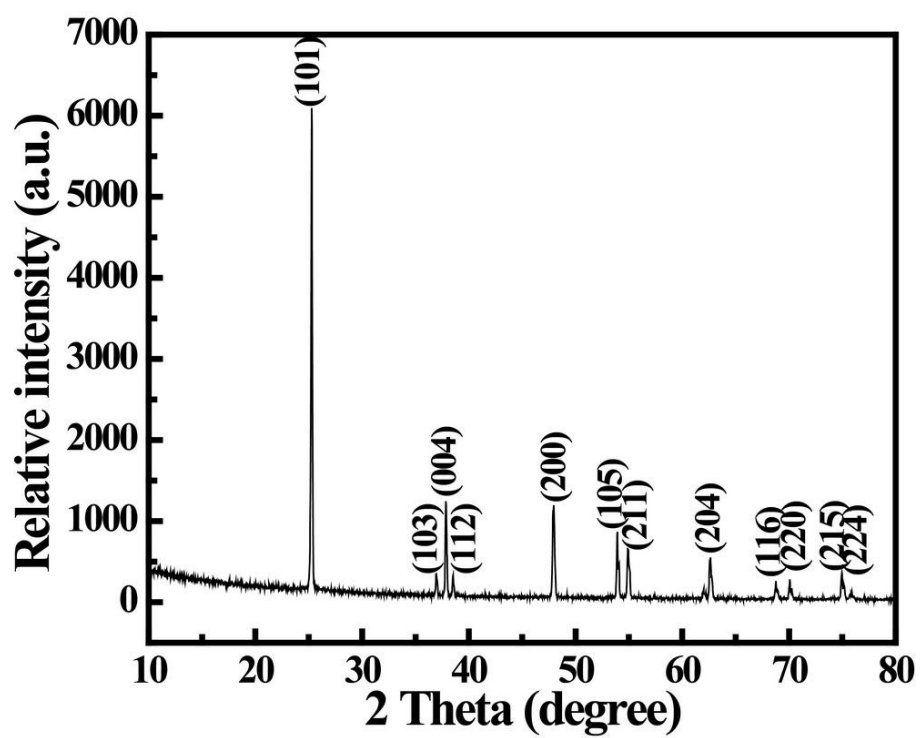

**Fig. S4.** XRD pattern of prepared sample. The XRD pattern of prepared sample is assigned to anatase TiO<sub>2</sub> (JCPDS standard card #71-1167).

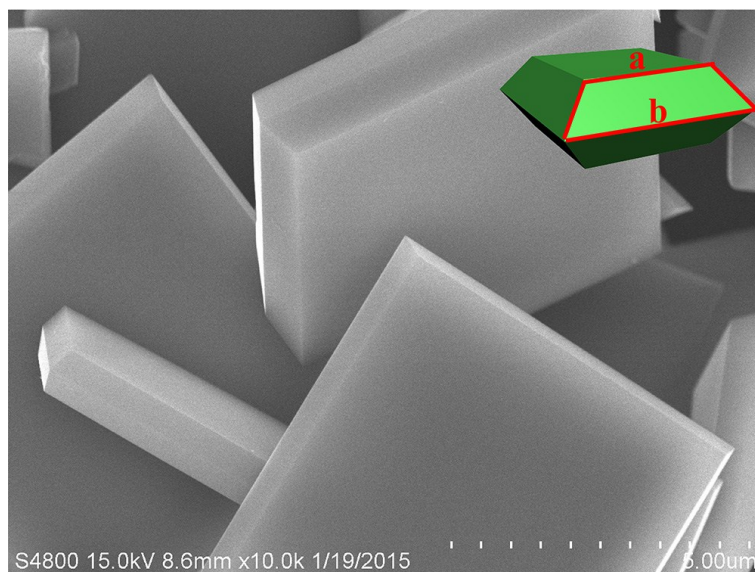

**Fig. S5.** FESEM image of prepared TiO<sub>2</sub> exposed with {001} and {101} facets. The area percentage of {001} facets on prepared TiO<sub>2</sub> ranges from 69.8% to 73.9% with average percentage of 71.7%, which are calculated by formulas:  $S_{001}\% = \cos\theta / (\cos\theta + b^2/a^2 - 1)$  and  $S_{101}\% = 1 - S_{001}\%$ .<sup>4</sup> Here  $\theta$  is the theoretical value (68.3°) of angle between the {001} and {101} facets of anatase TiO<sub>2</sub>. As shown in the inset above, two independent parameters  $a$  and  $b$  represent the lengths of the side of the square {001} truncation facets and the side of the bipyramid, respectively.



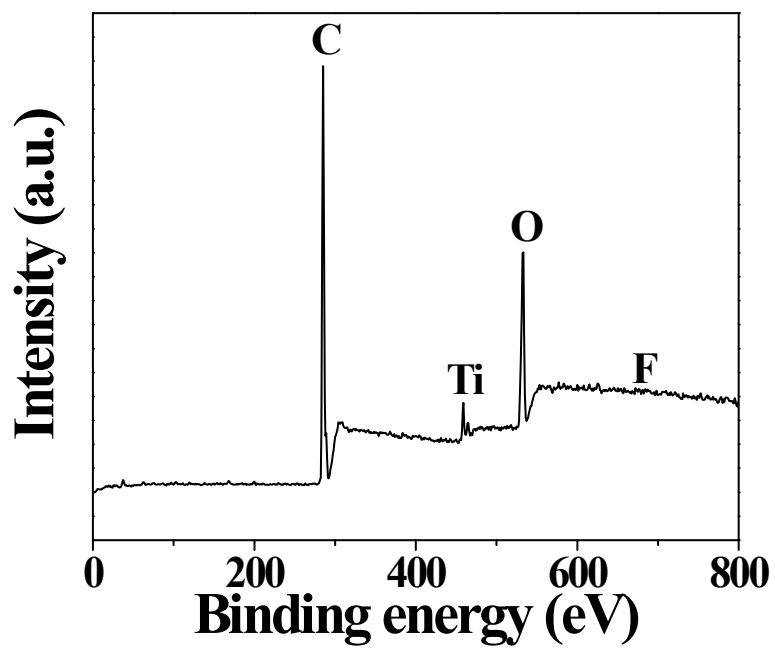

**Fig. S6.** XPS spectra of prepared  $\text{TiO}_2$ . The XPS spectrum shows no peaks at the region of F element, confirming that the surface F species on  $\text{TiO}_2$  surface are effectively removed by 450 °C calcination treatment

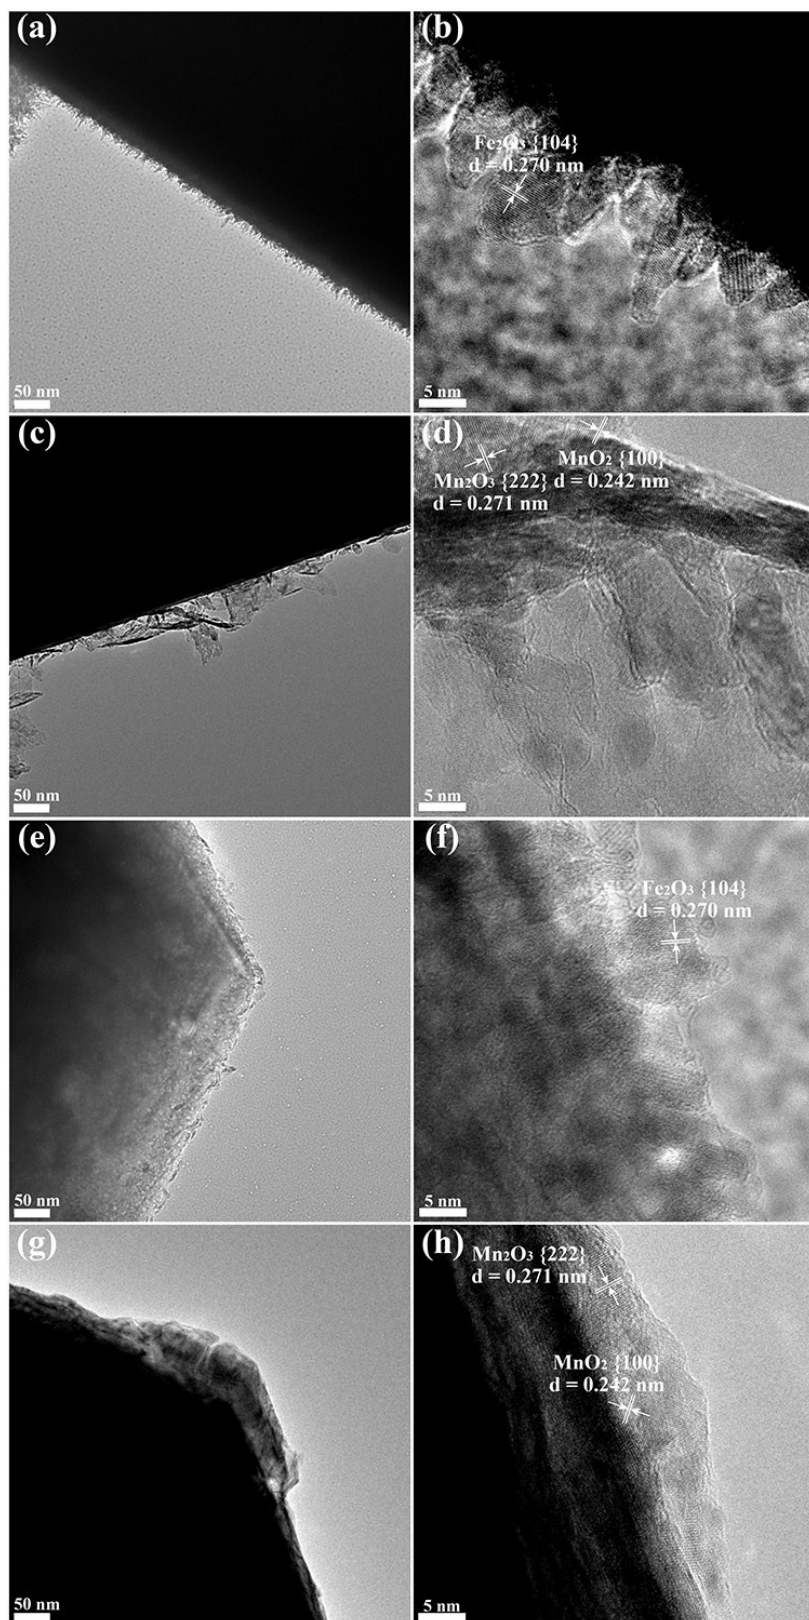

**Fig. S7.** HRTEM images of  $\text{TiO}_2$  with metal oxides deposited: (a and b)  $\text{Fe}_2\text{O}_3/\text{TiO}_2$  with  $\text{Fe}^{2+}$  ions as Fe source, (c and d)  $\text{MnO}_x/\text{TiO}_2$  with  $\text{Mn}^{2+}$  ions as Mn source, (e and f)  $\text{Fe}_2\text{O}_3/\text{TiO}_2$  with  $\text{FeO}_4^{2-}$  ions as Fe source and (g and h)  $\text{MnO}_x/\text{TiO}_2$  with  $\text{MnO}_4^-$  ions as Mn source. HRTEM images confirm the formation of rhombohedral  $\text{Fe}_2\text{O}_3$  and  $\text{MnO}_x$  (cubic  $\text{Mn}_2\text{O}_3$  and hexagonal  $\text{MnO}_2$ ).

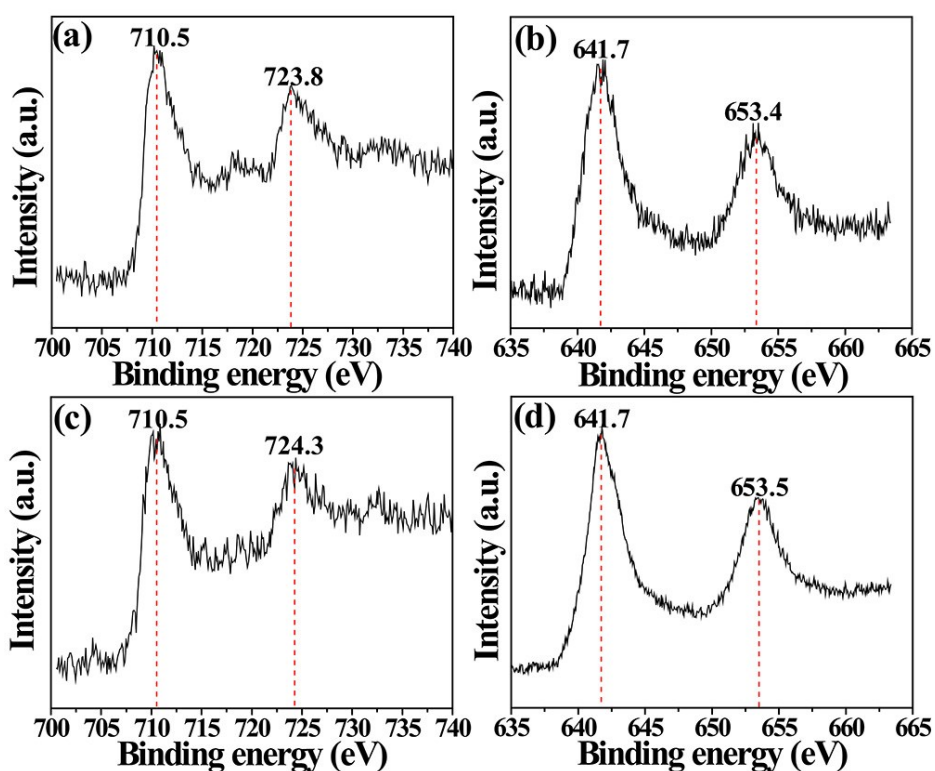

**Fig. S8.** XPS spectra of samples with metal oxide deposited: (a) Fe<sub>2</sub>O<sub>3</sub>/TiO<sub>2</sub> with Fe<sup>2+</sup> ions as Fe source, (b) MnO<sub>x</sub>/TiO<sub>2</sub> with Mn<sup>2+</sup> ions as Mn source, (c) Fe<sub>2</sub>O<sub>3</sub>/TiO<sub>2</sub> with FeO<sub>4</sub><sup>2-</sup> ions as Fe source and (d) MnO<sub>x</sub>/TiO<sub>2</sub> with MnO<sub>4</sub><sup>-</sup> ions as Mn source.

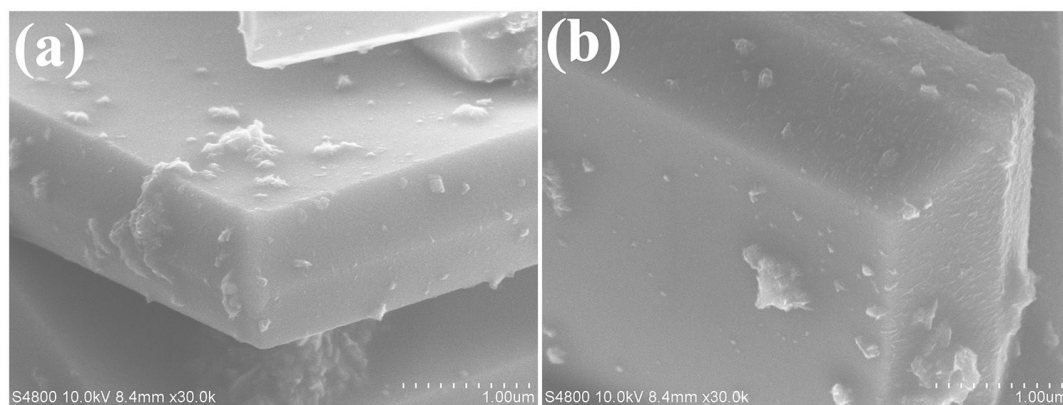

**Fig. S9.** FESEM images of TiO<sub>2</sub> with metal oxides deposited by conventional chemical reaction: (a) Fe<sub>2</sub>O<sub>3</sub>/TiO<sub>2</sub> with Fe<sup>2+</sup> ions as Fe source and (b) Fe<sub>2</sub>O<sub>3</sub>/TiO<sub>2</sub> with FeO<sub>4</sub><sup>2-</sup> ions as Fe source.

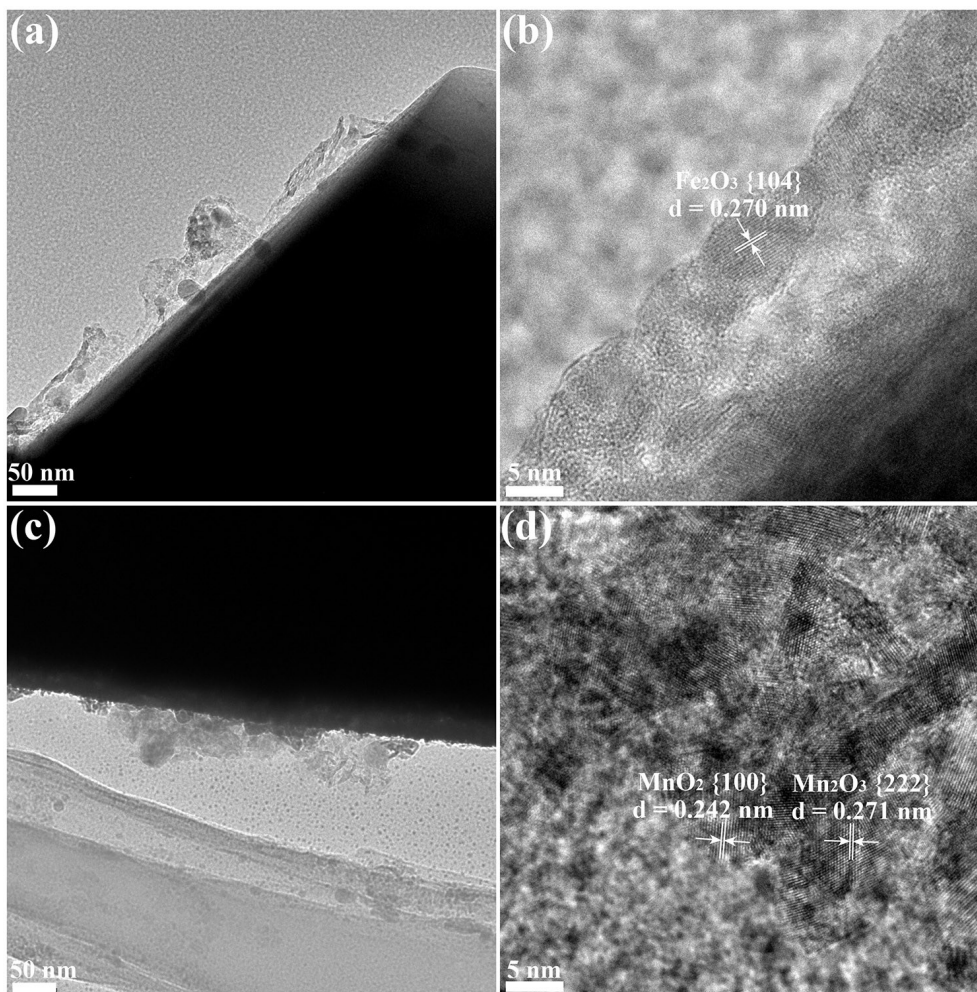

**Fig. S10.** HRTEM images of the Fe<sub>2</sub>O<sub>3</sub>/TiO<sub>2</sub> and MnO<sub>x</sub>/TiO<sub>2</sub> samples prepared by photo-reduction at pH = 13.5.

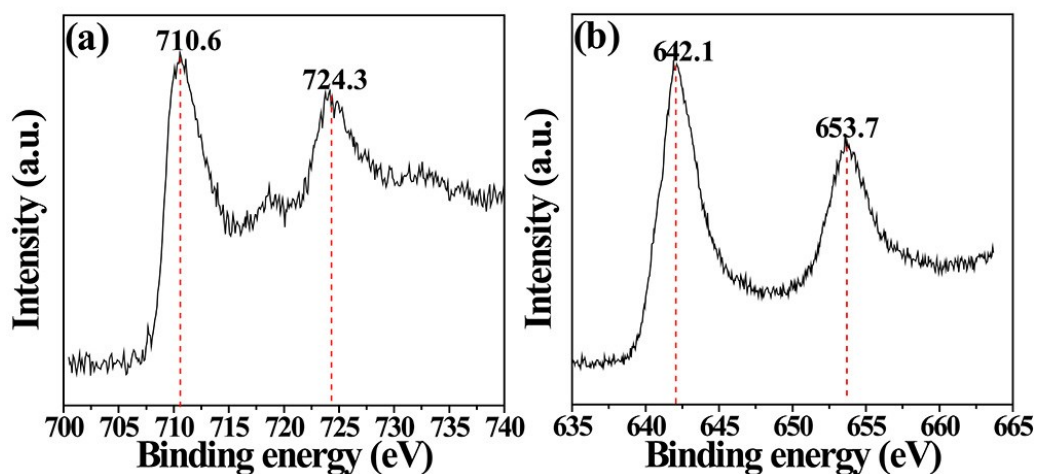

**Fig. S11.** XPS spectra of samples with metal oxide deposited: (a)  $\text{Fe}_2\text{O}_3/\text{TiO}_2$  with  $\text{FeO}_4^{2-}$  ions as Fe source at pH = 13.5 and (b)  $\text{MnO}_x/\text{TiO}_2$  with  $\text{MnO}_4^-$  ions as Mn source at pH = 13.5.

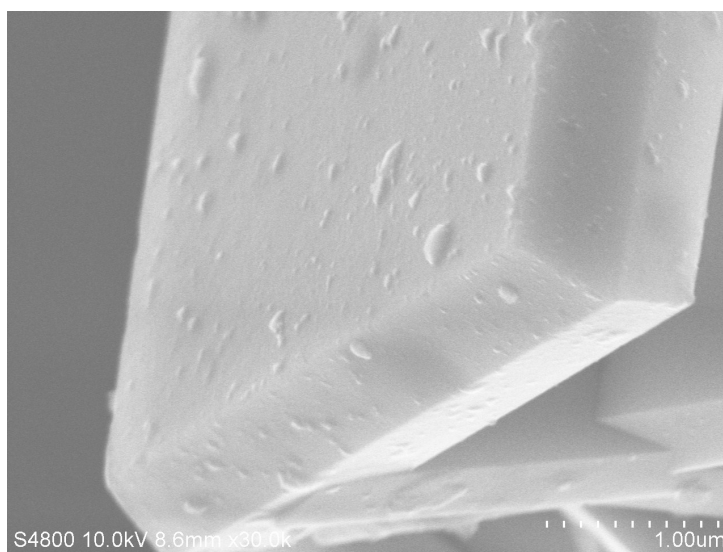

**Fig. S12.** FESEM images of  $\text{Fe}_2\text{O}_3/\text{TiO}_2$  samples  $\text{FeO}_4^{2-}$  ions as Fe source prepared by conventional chemical reaction at pH = 13.5.

- (1) J. Pan, G. Liu, G. Q. Lu and H. M. Cheng, *Angew. Chem. Int. Ed.*, 2011, **50**, 2133–2137.
- (2) G. Liu, C. Sun, H. G. Yang, S. C. Smith, L. Wang, G. Q. Lu and H. M. Cheng, *Chem. Commun.*, 2010, **46**, 755-757.
- (3) J. Cheng and M. Sprik, *J. Chem. Theory Comput.* 2010, 6, 880–889.
- (4) J. G. Yu, J. X. Low, W. Xiao, P. Zhou and M. Jaroniec, *J. Am. Chem. Soc.*, 2014, 136, 8839–8842.
